# Supplementary figures and images for: The artificial production of viral-like particles in Nicotiana benthamiana suggests the pro-assembly role of the Cannabis cryptic virus RdRP
Source: Springer Nature journal article supplement (doi:10.1007/s42161-024-01628-w), 2024-04-29

RNA1

RNA2

ssRNA1(+)  
ssRNA1(-)  
ssRNA1(-) No Tag  
H2O

ssRNA2(+)  
ssRNA2(-)  
ssRNA2(-) No Tag  
H2O

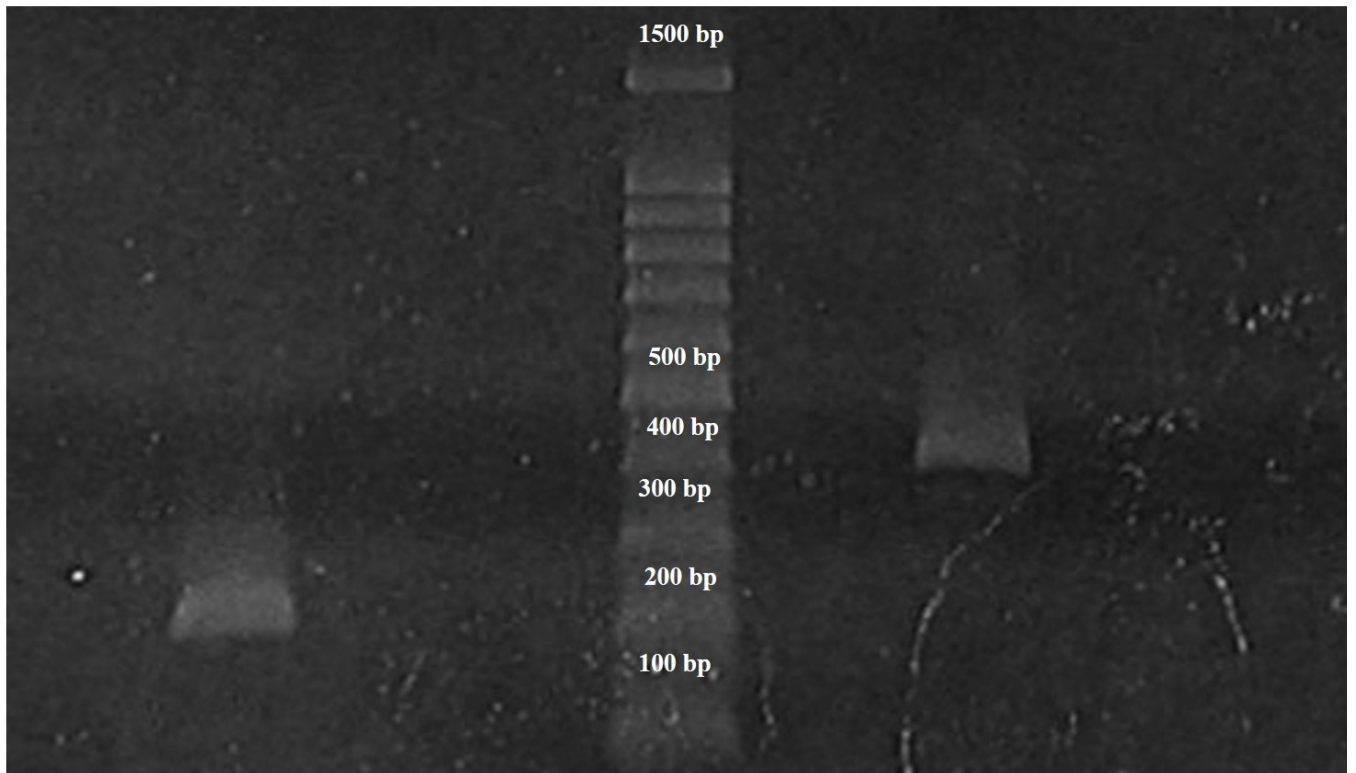

Supplement: MOESM1 [file 42161_2024_1628_MOESM1_ESM.pdf]
